# Supplementary material for: Insights into Two Novel Orthopalladated Chromophores with Antimicrobial Activity against Escherichia coli
Source: MDPI journal article supplement (doi:10.3390/molecules27186060), 2022-09-16
Supplement: s1 [file s1]

# Insights into two novel orthopalladated chromophores with antimicrobial activity against *Escherichia coli*

Rosita Diana<sup>1</sup>, Francesco Silvio Gentile<sup>2</sup>, Antonio Carella<sup>3</sup>, Luigi Di Costanzo<sup>1</sup>, Barbara Panunzi<sup>1\*</sup>

<sup>1</sup> Department of Agricultural Sciences, University of Naples Federico II, Portici, NA, Italy

<sup>2</sup> Department of Pharmacy, University of Salerno, Fisciano, SA, Italy

<sup>3</sup> Department of Chemical Sciences, University of Naples Federico II, NA, Italy

## Supplementary Material

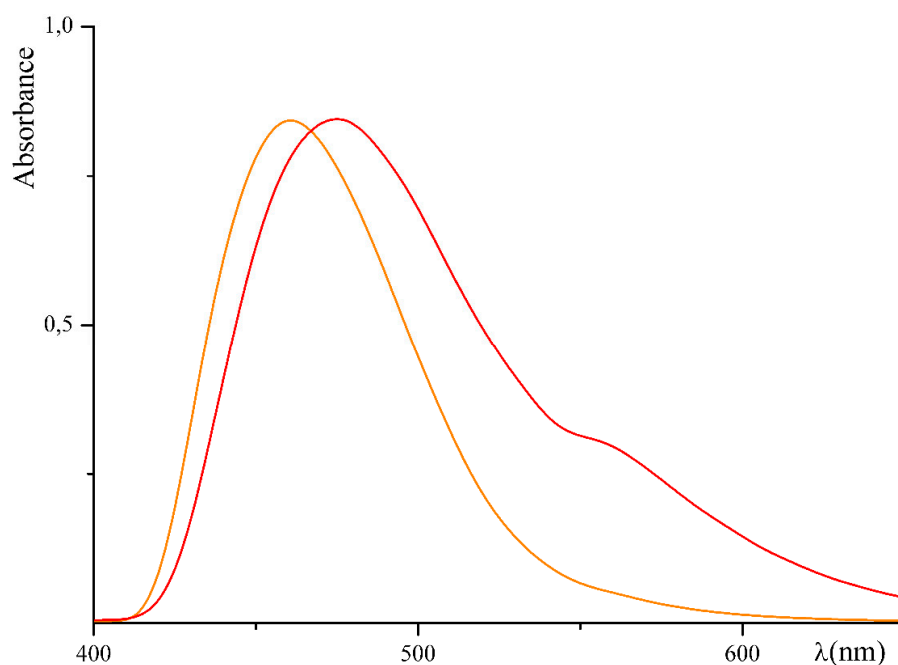

**Figure S1.** Absorbance spectra of Pd1 (red curve) and Pd2 (yellow curve) in the solid phase.

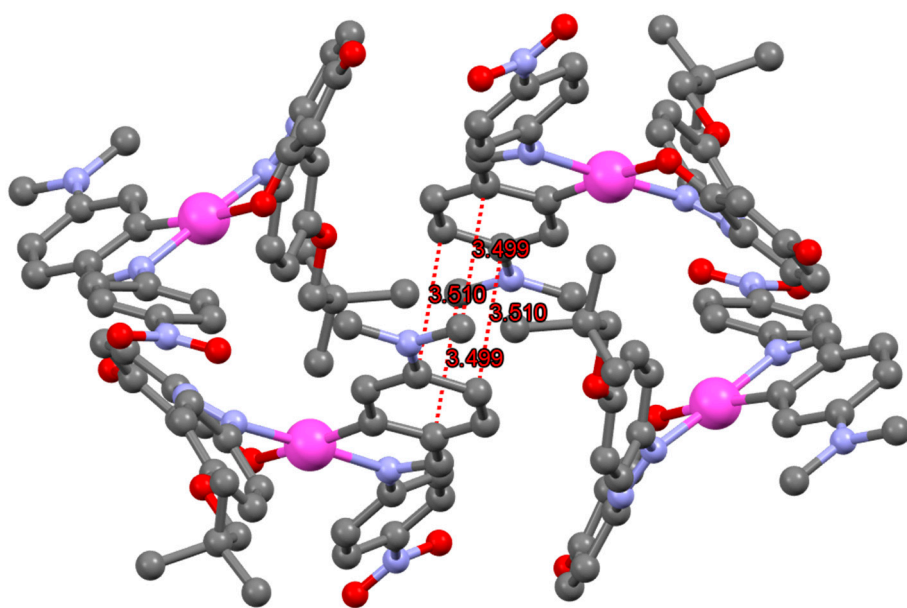

**Figure S2.** A selection of symmetric short distances  $\text{-CH}_3\text{--}\pi$  and  $\pi\text{--}\pi$  displaced stacking interactions

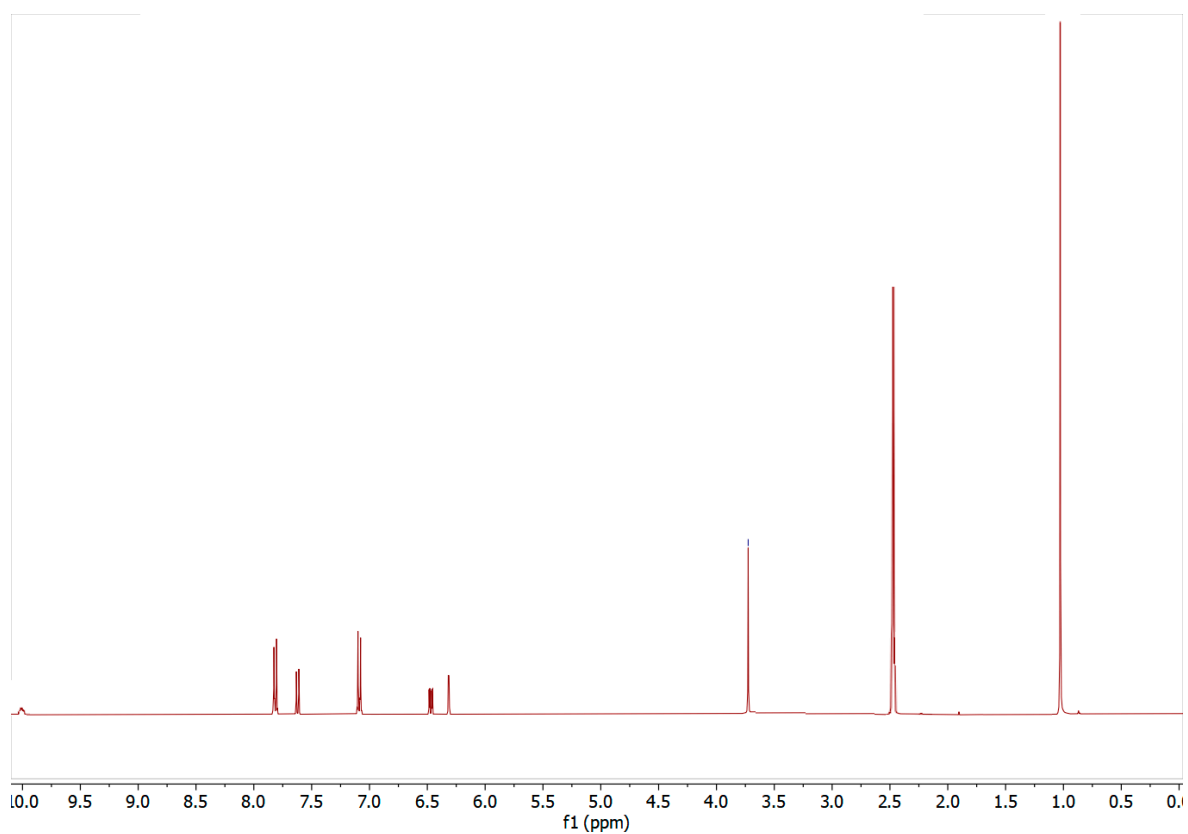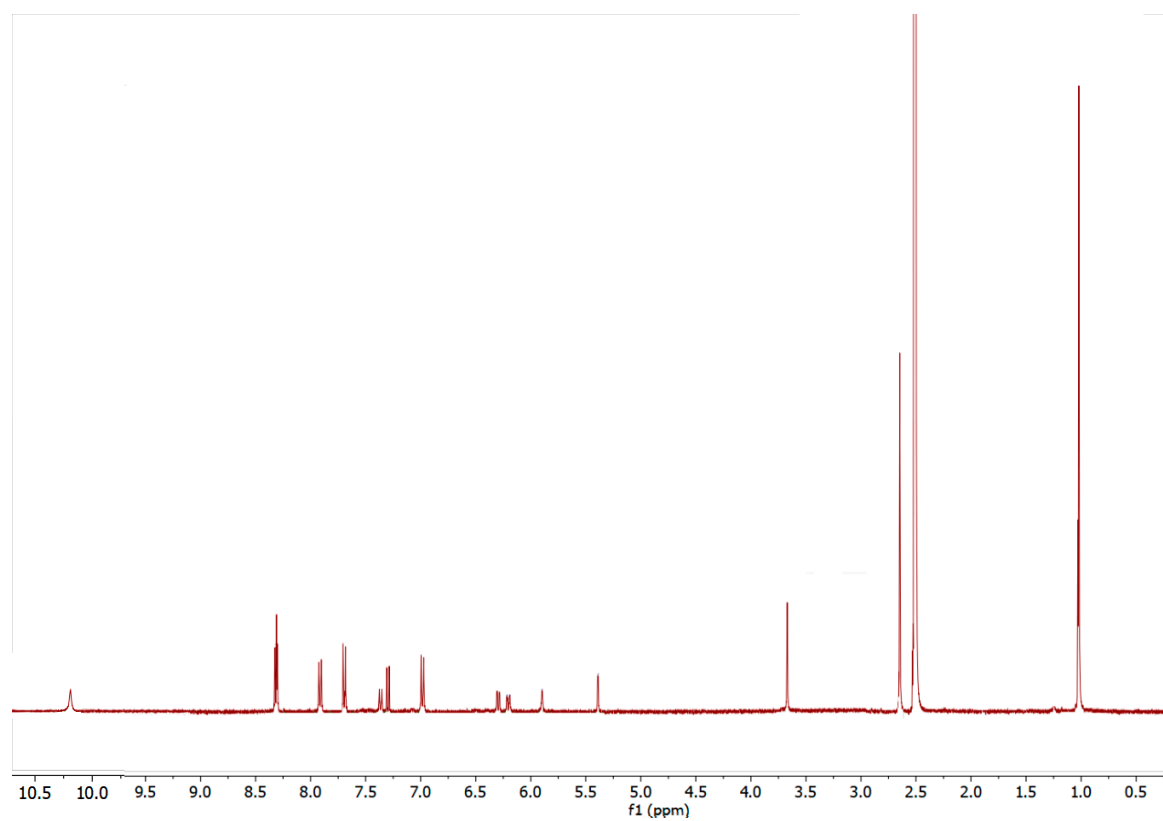

**Figure S3.**  $^1\text{H}$ -NMR (400 MHz, DMSO- $\text{d}_6$ , 25  $^\circ\text{C}$ , ppm) spectra of L1 (above) and Pd1(below)

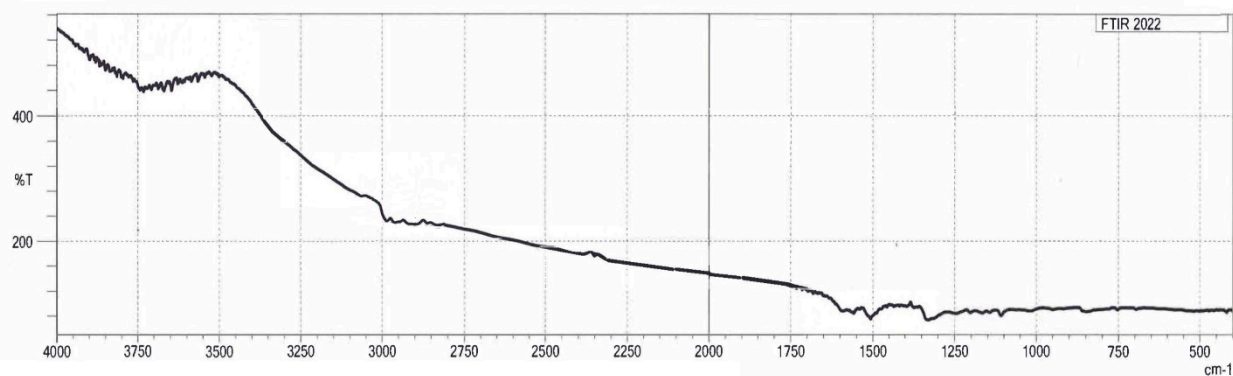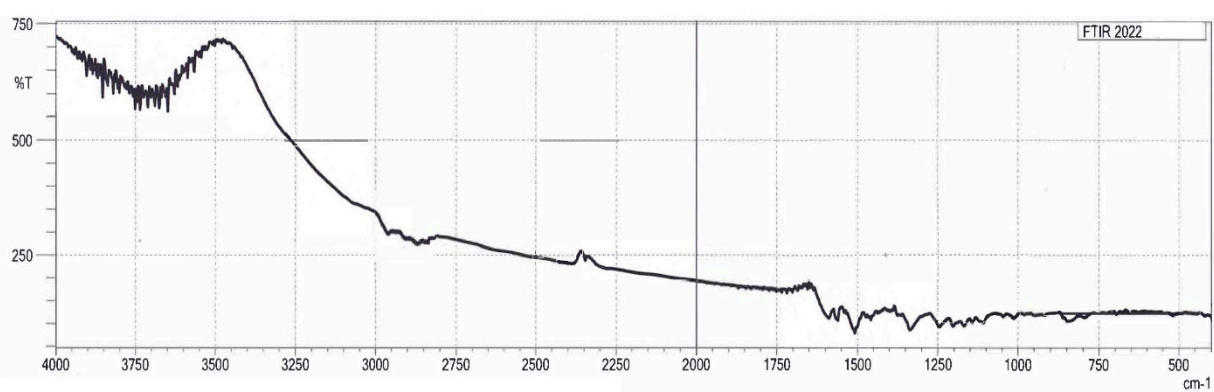

**Figure S4.** FT-IR spectra of of L1 (above) and Pd1(below) in KBr

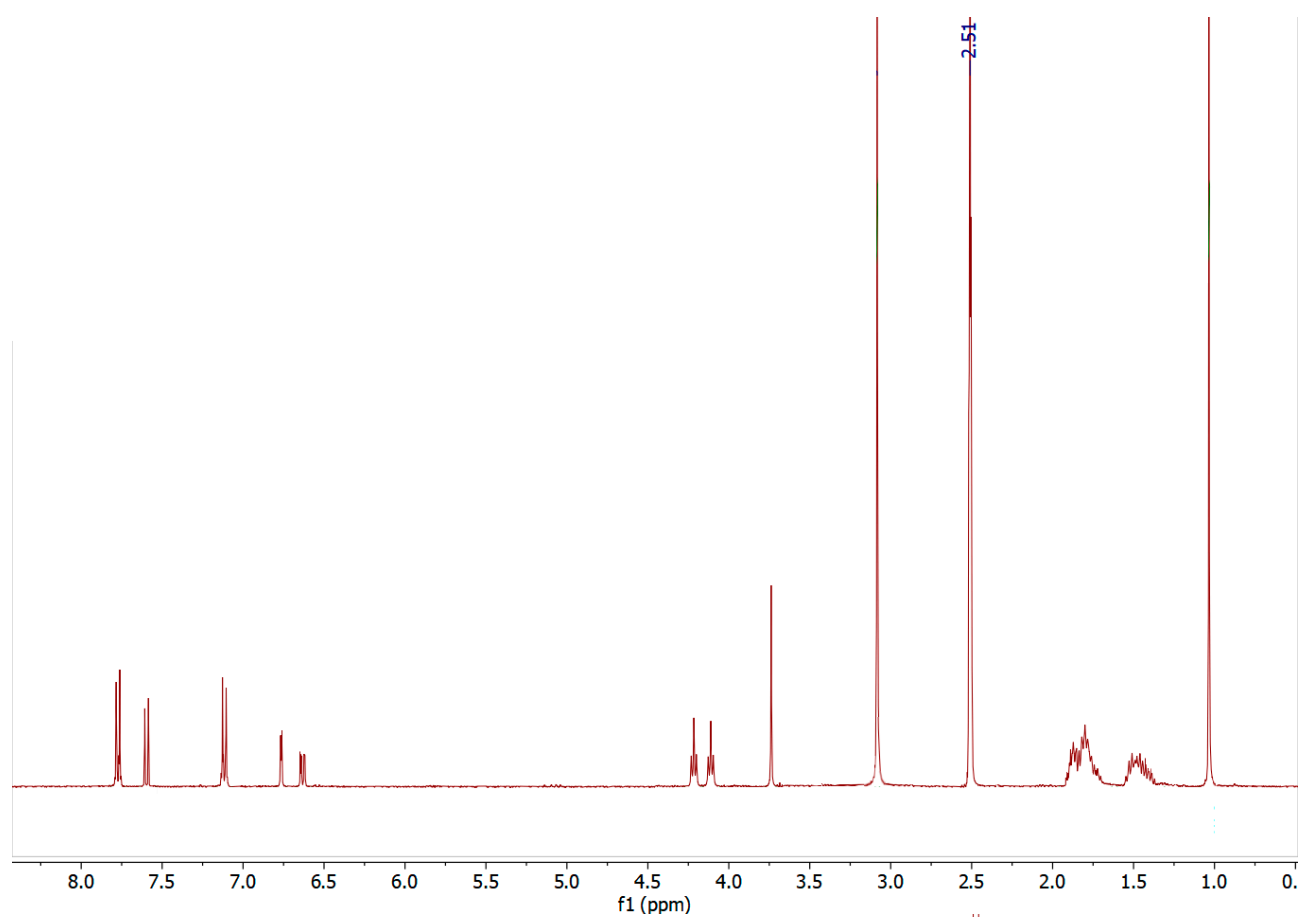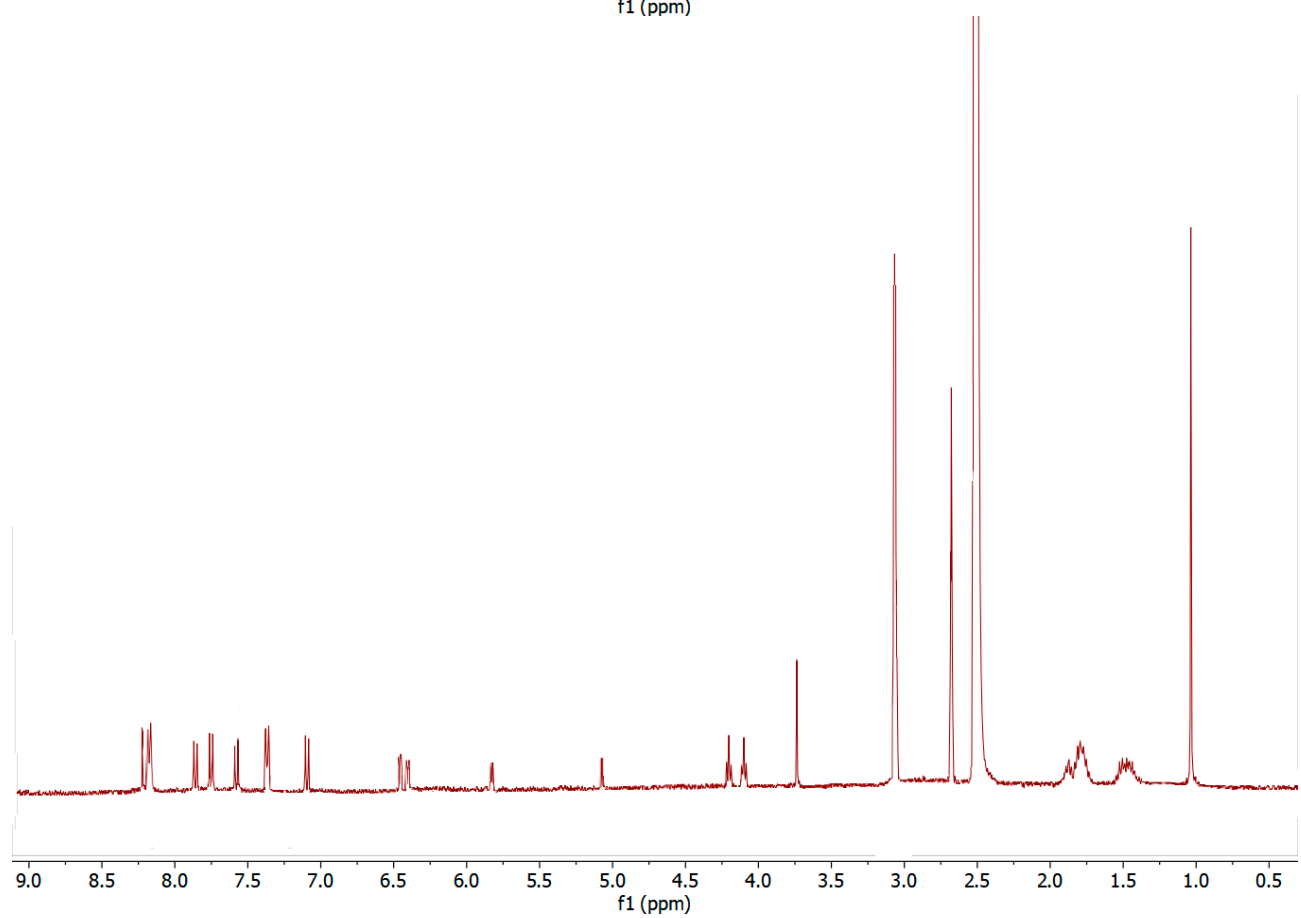

**Figure S5.**  $^1\text{H}$ -NMR (400 MHz, DMSO- $d_6$ , 25  $^\circ\text{C}$ , ppm) spectra of L2 (above) and Pd2(below)

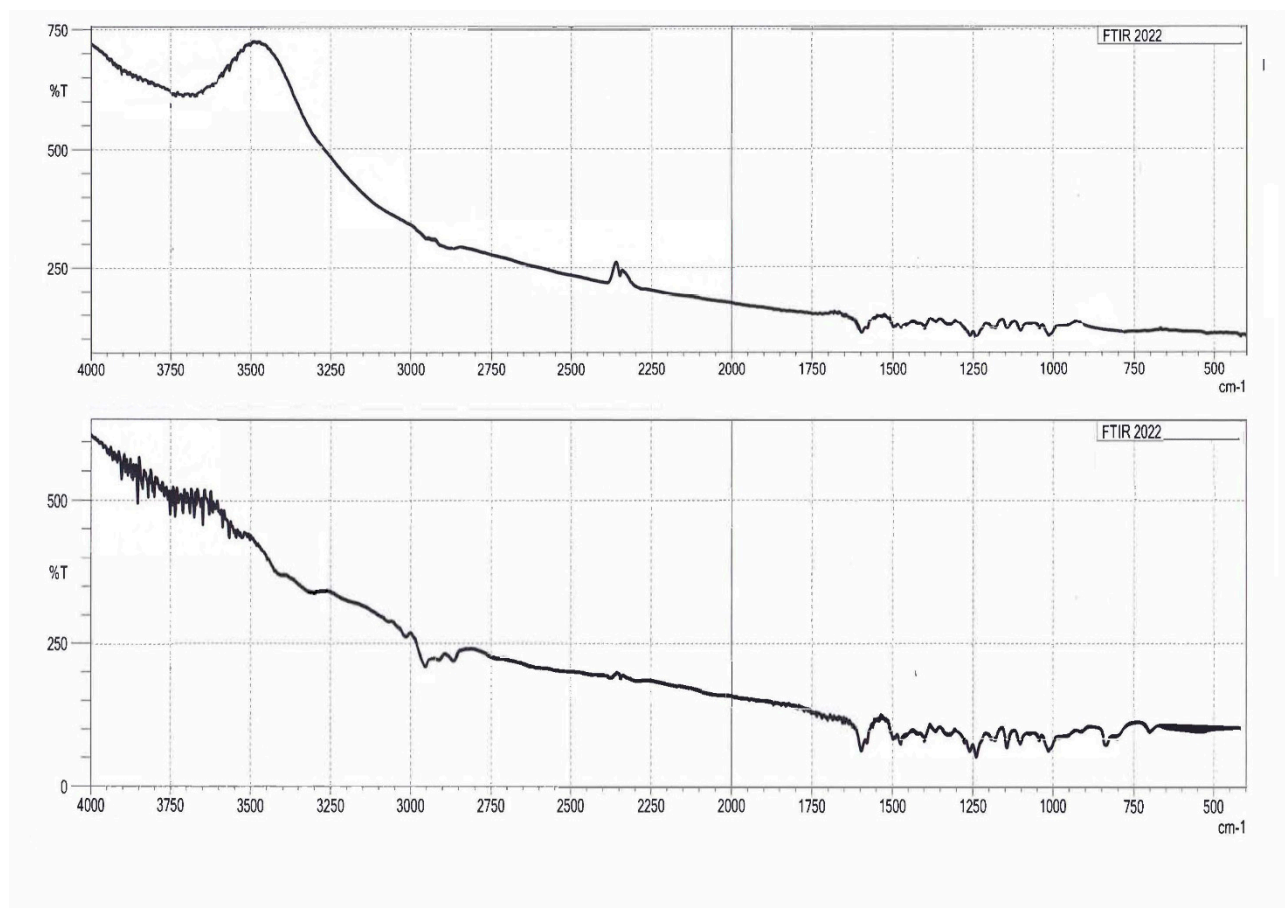

**Figure S6.** FT-IR spectra of L2 (above) and Pd2 (below) in KBr
